# Supplementary material for: Adjuvant Hormonotherapy and Cardiovascular Risk in Post-Menopausal Women with Breast Cancer: A Large Population-Based Cohort Study
Source: MDPI journal article supplement (doi:10.3390/cancers13092254), 2021-05-08
Supplement: s1 [file s1]

**Table S1.** ICD-9 CM and ATC codes of diseases/conditions and medicaments drugs used for the current study.

| <b>Disease/condition</b>                       | <b>ICD9-CM codes</b>                  |
|------------------------------------------------|---------------------------------------|
| Breast cancer                                  | 174                                   |
| Any malignant cancer                           | 140–208                               |
| Breast cancer surgery                          | 85.20–85.25, 85.33–85.36, 85.41–85.48 |
| Distant metastases                             | 197, 198, 199.0                       |
| Myocardial infarction                          | 410                                   |
| Congestive heart failure                       | 428                                   |
| Ischemic stroke                                | 433–434, 436                          |
| Peripheral vascular disease                    | 443                                   |
| Venous thromboembolism                         | 453                                   |
| Chronic obstructive pulmonary disease          | 490–492, 494, 496                     |
| Chronic kidney disease                         | 585, 586, 584.5–584.9                 |
| Chemotherapy                                   | V58.1, 99.25, 99.28                   |
| Radiotherapy                                   | 922, V58.0                            |
| <b>Drug</b>                                    | <b>ATC codes</b>                      |
| Antineoplastic drugs                           | L01                                   |
| Aromatase inhibitors                           | L02BG03, L02BG04, L02BG06             |
| Tamoxifen                                      | L02BA01                               |
| Anticoagulants                                 | B01AA, B01AE, B01AF                   |
| Antidepressant                                 | N06                                   |
| Antidiabetic                                   | A10                                   |
| Antihypertensive                               | C02, C03, C07, C08, C09               |
| Statins                                        | C10                                   |
| Antithrombotic                                 | B01AC                                 |
| Bisphosphonates                                | M05BA, M05BB                          |
| Non-steroidal anti-inflammatory drugs (NSAIDs) | M01A, M01B                            |
| Opioids                                        | N02A                                  |
| Hormone replacement therapy                    | G03C                                  |
